# Supplementary material for: Low-melting sugar–urea–salt mixtures as solvents for Diels–Alder reactions
Source: Royal Society of Chemistry journal article supplement (doi:10.1039/b414515a), 2005-01-01
Supplement: b414515a.pdf [file b414515a.pdf]

**Low Melting Sugar – Urea - Salt Mixtures as Solvents for Organic Reactions****Supporting Information****Table S-1.** Melting points of mixtures of carbohydrates, citric acid, sorbitol, urea and inorganic salts in different composition

| Melting point | Fructose | Urea | Dimethylurea | NH <sub>4</sub> Cl | NaCl |
|---------------|----------|------|--------------|--------------------|------|
| 65 °C         | 60       | 40   |              |                    |      |
| 67 °C         | 50       | 50   |              |                    |      |
| 73 °C         | 70       | 20   |              |                    | 10   |
| 71 °C         | 60       | 20   |              |                    | 20   |
| 78 °C         | 60       | 30   |              |                    | 10   |
| 78 °C         | 50       | 25   |              |                    | 25   |
| 71 °C         | 50       | 40   |              |                    | 10   |
| 73 °C         | 50       | 30   |              |                    | 20   |
| 73 °C         | 50       | 20   |              |                    | 30   |
| 75 °C         | 70       |      | 30           |                    |      |
| 71 °C         | 60       |      | 40           |                    |      |
| 72 °C         | 50       |      | 50           |                    |      |
| 75 °C         | 40       |      | 60           |                    |      |
| 77 °C         | 30       |      | 70           |                    |      |
| 73 °C         | 60       |      | 30           | 10                 |      |
| 71 °C         | 50       |      | 40           | 10                 |      |
| 72 °C         | 50       |      | 30           | 20                 |      |

  

| Melting point | Maltose | Dimethylurea | NaCl | NH <sub>4</sub> Cl |
|---------------|---------|--------------|------|--------------------|
| 83 °C         | 30      | 70           |      |                    |
| 82 °C         | 60      | 30           | 10   |                    |
| 84 °C         | 50      | 40           | 10   |                    |
| 83 °C         | 50      | 30           | 20   |                    |
| 84 °C         | 50      | 40           | 10   |                    |
| 73 °C         | 50      | 40           |      | 10                 |

| Melting point | Glucose | Dimethylurea | Urea | NH <sub>4</sub> Cl | CaCl <sub>2</sub> |
|---------------|---------|--------------|------|--------------------|-------------------|
| 92 °C         | 60      | 40           |      |                    |                   |
| 89 °C         | 50      | 50           |      |                    |                   |
| 88 °C         | 40      | 60           |      |                    |                   |
| 87 °C         | 30      | 70           |      |                    |                   |
| 81 °C         | 60      | 30           |      | 10                 |                   |
| 75 °C         | 50      | 40           |      | 10                 |                   |
| 89 °C         | 50      | 40           |      | 10                 |                   |
| 78 °C         | 60      |              | 30   | 10                 |                   |
| 84 °C         | 50      |              | 25   | 25                 |                   |
| 76 °C         | 50      |              | 40   | 10                 |                   |
| 77 °C         | 50      |              | 30   | 20                 |                   |
| 75 °C         | 50      |              | 40   |                    | 10                |

| Melting point | Mannose | Dimethylurea |
|---------------|---------|--------------|
| 92 °C         | 60      | 40           |
| 75 °C         | 30      | 70           |

| Melting point | Lactose | Dimethylurea | NH <sub>4</sub> Cl |
|---------------|---------|--------------|--------------------|
| 88 °C         | 60      | 30           | 10                 |
| 86 °C         | 50      | 40           | 10                 |

| Melting point | Citric acid | Dimethylurea |
|---------------|-------------|--------------|
| 65 °C         | 40          | 60           |
| 64 °C         | 30          | 70           |

| Melting point | Sorbit | Dimethylurea | Urea | NH <sub>4</sub> Cl |
|---------------|--------|--------------|------|--------------------|
| 77 °C         | 40     | 60           |      |                    |
| 76 °C         | 30     | 70           |      |                    |
| 67 °C         | 70     |              | 20   | 10                 |

| Melting point | Mannitol | Dimethylurea | NH <sub>4</sub> Cl |
|---------------|----------|--------------|--------------------|
| 89 °C         | 50       | 40           | 10                 |

| Melting point | α Cyclodex. | Dimethylurea |
|---------------|-------------|--------------|
| 77 °C         | 30          | 70           |

**Table S-2.** *Endo-exo* ratios of the reaction of **1** with **2a** and **2b** in different melts and with addition of LiClO<sub>4</sub> and Ce(OTf)<sub>3</sub>.

| Composition of reaction melt                   | M.P. [°C] | Endo/exo ratio <sup>1</sup> |         |                                      |                                      |                                       |                                       |
|------------------------------------------------|-----------|-----------------------------|---------|--------------------------------------|--------------------------------------|---------------------------------------|---------------------------------------|
|                                                |           | 1 + 2a                      |         | 1 + 2a + 1 equiv. LiClO <sub>4</sub> | 1 + 2b + 1 equiv. LiClO <sub>4</sub> | 1 + 2a + 10 mol% Ce(OTf) <sub>3</sub> | 1 + 2b + 10 mol% Ce(OTf) <sub>3</sub> |
| Fructose / Urea (60:40)                        | 65°C      | 2.7 : 1                     | 2.3 : 1 | 2.3 : 1                              | Dec. <sup>2</sup>                    | 2.3 : 1                               | 2.7 : 1                               |
| Fructose / Urea / NaCl (70:20:10)              | 73°C      | 2.6 : 1                     | 2.8 : 1 | 3.2 : 1                              | 3.3 : 1                              | 3.8 : 1                               | 2.9 : 1                               |
| Fructose / DMU <sup>3</sup> (70:30)            | 71°C      | 2.9 : 1                     | 3.0 : 1 | 3.0 : 1                              | 3.4 : 1                              | 3.4 : 1                               | 3.1 : 1                               |
| Maltose / DMU (30:70)                          | 83°C      | 3.3 : 1                     | 3.9:1   | 3.6 : 1                              | 3.4 : 1                              | 3.6 : 1                               | 3.3 : 1                               |
| Maltose / DMU / NaCl (50:40:10)                | 84°C      | 2.2 : 1                     | 3.5 : 1 | 3.5 : 1                              | 3.7 : 1                              | 3.2 : 1                               | 3.2 : 1                               |
| Maltose / DMU / NH <sub>4</sub> Cl (50:40:10)  | 73°C      | 3.1 : 1                     | 2.6 : 1 | 3.2 : 1                              | 3.3 : 1                              | 3.8 : 1                               | 3.1 : 1                               |
| Mannose / DMU (30 : 70)                        | 75°C      | 3.4 : 1                     | 3.1 : 1 | 3.8 : 1                              | 3.8 : 1                              | 3.2 : 1                               | 3.8 : 1                               |
| Lactose / DMU / NH <sub>4</sub> Cl (60:30:10)  | 88°C      | 3.6 : 1                     | 2.1 : 1 | 3.1 : 1                              | 4.5 : 1                              | 3.6 : 1                               | 2.4 : 1                               |
| Glucose / DMU (60 : 40)                        | 92°C      | 3 : 1                       | 2.4 : 1 | 3.0 : 1                              | 2.4 : 1                              | 3.3 : 1                               | 3.0 : 1                               |
| Glucose / Dimethy.Urea 30 : 70                 | 87°C      | 3.5 : 1                     | 4.1 : 1 | 4.1 : 1                              | 5.2 : 1                              | 3.5 : 1                               | 3.3 : 1                               |
| Glucose / DMU / NH <sub>4</sub> Cl (50:40:10)  | 75°C      | 2.5 : 1                     | 3 : 1   | 4.1 : 1                              | 3.3 : 1                              | 3.4 : 1                               | 2.8 : 1                               |
| Mannitol / DMU / NH <sub>4</sub> Cl (50:40:10) | 89°C      | 2.65 : 1                    | 3.5 : 1 | 3.76 : 1                             | 3.8 : 1                              | 3.44 : 1                              | 4.0 : 1                               |
| α-Cyclodextrine / DMU (30:70)                  | 77°C      | 3.5 : 1                     | 3.6 : 1 | 2.8 : 1                              | 3.8 : 1                              | -                                     | 3.3 : 1                               |
| Citric Acid / DMU (40:60)                      | 65°C      | 3.6 : 1                     | 2.8 : 1 | 4.5 : 1                              | 3.4 : 1                              | 3.8 : 1                               | 4.0 : 1                               |
| Glucose / Urea / NH <sub>4</sub> Cl (60:30:10) | 78°C      | 2.5 : 1                     | 3 : 1   | 2.6 : 1                              | 2.9 . 1                              | 2.5 : 1                               | 2.5 : 1                               |
| Glucose / Urea / CaCl <sub>2</sub> (50:40:10)  | 75°C      | 3.2 : 1                     | 2.6 : 1 | 2.3 : 1                              | 2.7 : 1                              | 3.3 : 1                               | 2.6 : 1                               |
| Fructose / DMU / NH <sub>4</sub> Cl (60:30:10) | 73°C      | 3.7 : 1                     | 2.7 : 1 | 3.4 : 1                              | 2.3 : 1                              | 3.7 : 1                               | 3.0 : 1                               |
| Sorbitol / DMU (40:60)                         | 77°C      | 3.7 : 1                     | 4.4 : 1 | 4.0 : 1                              | 4.0 : 1                              | 3.7 : 1                               | 3.1 : 1                               |
| Sorbitol / DMU / NH <sub>4</sub> Cl (70:20:10) | 67°C      | 5.0 : 1                     | 3.7 : 1 | 3.2 : 1                              | 2.5 : 1                              | 3.1 : 1                               | 2.5 : 1                               |

<sup>1</sup>Determined by gas chromatography. <sup>2</sup>Decomposition of reaction mixture. <sup>3</sup>N,N-dimethylurea.
